# Supplementary material for: Mycotoxins from Tomato Pathogenic Alternaria alternata and Their Combined Cytotoxic Effects on Human Cell Lines and Male Albino Rats
Source: MDPI journal article supplement (doi:10.3390/jof9030282), 2023-02-21
Supplement: s1 [file s1]

**Table S1.** Reference sequences retrieved from GenBank database used for phylogenetic analysis.

| Species Name                      | Isolate Number          | Host                           | Location    | GenBank Accession Numbers |              |               |
|-----------------------------------|-------------------------|--------------------------------|-------------|---------------------------|--------------|---------------|
|                                   |                         |                                |             | <i>rpb2</i>               | <i>gapdh</i> | <i>Alt-a1</i> |
| <i>Alternaria alstroemeriae</i>   | CBS 118808              | <i>Alstroemeria</i> sp.        | USA         | KP124764                  | KP124153     | KP123845      |
| <i>A. alternantherae</i>          | CBS 124392              | <i>Solanum melongena</i>       | China       | KC584374                  | KC584096     | KP123846      |
| <i>A. alternata</i>               | CBS 916.96 <sup>T</sup> | <i>Arachis hypogaeae</i>       | India       | KC584375                  | AY278808     | KC584375      |
| <i>A. alternata</i>               | CBS 119399 <sup>T</sup> | <i>Minneola tangelo</i>        | USA         | KP124829                  | JQ646328     | KP123910      |
| <i>A. alternata</i>               | CBS 119543 <sup>T</sup> | <i>Citrus paradisi</i>         | USA         | KP124831                  | KP124215     | KP123911      |
| <i>A. alternata</i>               | CBS 918.96              | <i>Dianthus chinensis</i>      | UK          | KC584435                  | AY278809     | AY563302      |
| <i>A. alternata</i>               | CBS 103.33 <sup>T</sup> | Soil                           | Egypt       | KP124770                  | KP124159     | KP123852      |
| <i>A. alternata</i>               | CBS 102.47              | <i>Citrus sinensis</i>         | USA         | KP124773                  | KP124161     | KP123855      |
| <i>A. alternata</i>               | ALT2265                 | <i>Solanum lycopersicum</i>    | Egypt       | OP893862                  | OP893842     | OP893822      |
| <i>A. alternata</i>               | ALT2262                 | <i>Solanum lycopersicum</i>    | Egypt       | OP893863                  | OP893843     | OP893823      |
| <i>A. alternata</i>               | ALT2261                 | <i>Solanum lycopersicum</i>    | Egypt       | OP893864                  | OP893844     | OP893824      |
| <i>A. alternata</i>               | ALT2258                 | <i>Solanum lycopersicum</i>    | Egypt       | OP893865                  | OP893845     | OP893825      |
| <i>A. alternata</i>               | ALT2257                 | <i>Solanum lycopersicum</i>    | Egypt       | OP893866                  | OP893846     | OP893826      |
| <i>A. alternata</i>               | ALT2255                 | <i>Solanum lycopersicum</i>    | Egypt       | OP893867                  | OP893847     | OP893827      |
| <i>A. alternata</i>               | ALT2254                 | <i>Solanum lycopersicum</i>    | Egypt       | OP893868                  | OP893848     | OP893828      |
| <i>A. alternata</i>               | ALT2246                 | <i>Solanum lycopersicum</i>    | Egypt       | OP893869                  | OP893849     | OP893829      |
| <i>A. alternata</i>               | ALT2244                 | <i>Solanum lycopersicum</i>    | Egypt       | OP893870                  | OP893850     | OP893830      |
| <i>A. alternata</i>               | ALT2242                 | <i>Solanum lycopersicum</i>    | Egypt       | OP893871                  | OP893851     | OP893831      |
| <i>A. alternata</i>               | ALT2236                 | <i>Solanum lycopersicum</i>    | Egypt       | OP893872                  | OP893852     | OP893832      |
| <i>A. alternata</i>               | ALT2232                 | <i>Solanum lycopersicum</i>    | Egypt       | OP893873                  | OP893853     | OP893833      |
| <i>A. alternata</i>               | ALT2230                 | <i>Solanum lycopersicum</i>    | Egypt       | OP893874                  | OP893854     | OP893834      |
| <i>A. alternata</i>               | ALT2224                 | <i>Solanum lycopersicum</i>    | Egypt       | OP893875                  | OP893855     | OP893835      |
| <i>A. alternata</i>               | ALT2223                 | <i>Solanum lycopersicum</i>    | Egypt       | OP893876                  | OP893856     | OP893836      |
| <i>A. alternata</i>               | ALT2215                 | <i>Solanum lycopersicum</i>    | Egypt       | OP893877                  | OP893857     | OP893837      |
| <i>A. alternata</i>               | ALT2213                 | <i>Solanum lycopersicum</i>    | Egypt       | OP893878                  | OP893858     | OP893838      |
| <i>A. alternata</i>               | ALT2210                 | <i>Solanum lycopersicum</i>    | Egypt       | OP893879                  | OP893859     | OP893839      |
| <i>A. alternata</i>               | ALT2208                 | <i>Solanum lycopersicum</i>    | Egypt       | OP893880                  | OP893860     | OP893840      |
| <i>A. alternata</i>               | ALT2203                 | <i>Solanum lycopersicum</i>    | Egypt       | OP893881                  | OP893861     | OP893841      |
| <i>Alternaria arborescens</i>     | CBS 101.13 <sup>T</sup> | Peat soil                      | Switzerland | KP124862                  | KP124244     | KP123940      |
| <i>Alternaria arborescens</i>     | CBS 119544 <sup>T</sup> | <i>Avena sativa</i>            | New Zealand | KP124878                  | KP125186     | KP123955      |
| <i>Alternaria betae-kenyensis</i> | CBS 118810              | <i>Beta vulgaris</i> var.cicla | Kenya       | JQ905180                  | JQ905161     | JQ905104      |
| <i>Alternaria burnsii</i>         | CBS 107.38              | <i>Cuminum cyminum</i>         | India       | JQ646457                  | JQ646305     | JQ646388      |
| <i>Alternaria burnsii</i>         | CBS 118816              | <i>Rhizophora mucronata</i>    | India       | KP124892                  | KP124273     | KP123970      |
| <i>Alternaria burnsii</i>         | CBS 118817              | <i>Tinospora cordifolia</i>    | India       | KP124893                  | KP124275     | KP123972      |
| <i>Alternaria eichhorniae</i>     | CBS 489.92 <sup>T</sup> | <i>Eichhornia crassipes</i>    | India       | KP124895                  | KP124276     | KP123973      |
| <i>Alternaria gaisen</i>          | CBS632.93               | <i>Pyrus pyrifolia</i>         | Japan       | KC584399                  | KC584116     | KP123974      |
| <i>Alternaria gaisen</i>          | CBS 118488              | <i>Pyrus pyrifolia</i>         | Japan       | KP124897                  | KP124278     | KP123975      |
| <i>Alternaria gossypina</i>       | CBS 104.32              | <i>Gossypium</i> sp.           | Zimbabwe    | KP124900                  | JQ646312     | JQ646395      |
| <i>Alternaria gossypina</i>       | CBS 107.36              | soil                           | Indonesia   | KP124901                  | JQ646310     | JQ646393      |
| <i>Alternaria iridiauxtralis</i>  | CBS 118486 <sup>T</sup> | <i>Iris</i> sp.                | Australia   | KP124905                  | KP124284     | KP123981      |
| <i>Alternaria iridiauxtralis</i>  | CBS 118487              | <i>Iris</i> sp.                | Australia   | KP124906                  | KP124285     | KP123982      |

|                                |                         |                             |           |          |          |          |
|--------------------------------|-------------------------|-----------------------------|-----------|----------|----------|----------|
| <i>Alternaria jacinthicola</i> | CBS 133751 <sup>T</sup> | <i>Arachis hypogaea</i>     | Mauritius | KP124908 | KP124287 | KP123984 |
| <i>Alternaria longipes</i>     | CBS 540.94              | <i>Nicotiana tabacum</i>    | USA       | KC584409 | AY278811 | AY563304 |
| <i>Alternaria longipes</i>     | CBS 121333              | <i>Nicotiana tabacum</i>    | USA       | KP124914 | KP124293 | KP123990 |
| <i>Alternaria tomato</i>       | CBS 103.30              | <i>Solanum lycopersicum</i> | Unknown   | KP124915 | KP124294 | KP123991 |
| <i>Alternaria tomato</i>       | CBS 114.35              | <i>Solanum lycopersicum</i> | Unknown   | KP124916 | KP124295 | KP123992 |

The ex-type cultures are indicated with superscript (T), and the isolates obtained in this study are boldfaced.

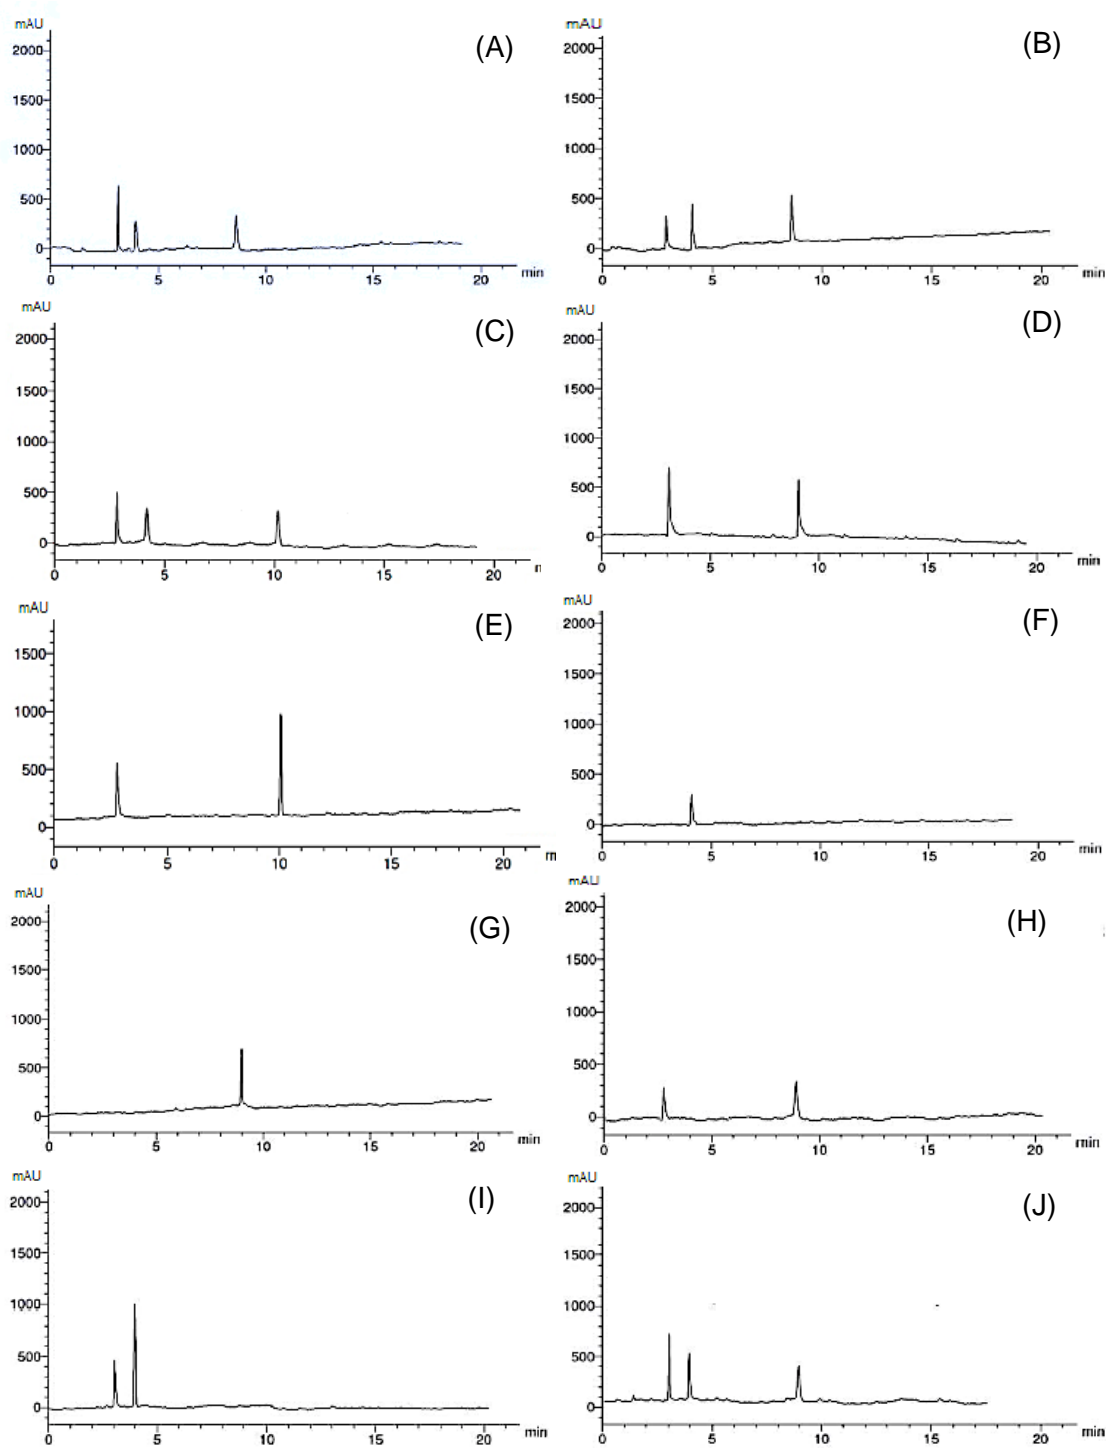

**Figure S1.** HPLC chromatograms of Alternuene (ALT), Alternariol (AOH), Tenuazonic Acid (TeA) and Alternuisol (AS) produced by *A. alternata* isolates: ALT 2261(A); ALT 2258 (B); ALT 2265 (C); ALT 2210 (D); ALT 2224 (E); ALT 2244 (F); ALT 2254 (G); ALT 2232 (H); ALT 2257 (I); ALT 2215 (J).
